# Supplementary material for: Uncovering Novel Genomic Regions and Candidate Genes for Senescence-Related Traits by Genome-Wide Association Studies in Upland Cotton (Gossypium hirsutum L.)
Source: Front Plant Sci. 2022 Jan 5;12:809522. doi: 10.3389/fpls.2021.809522 (PMC8766411; doi:10.3389/fpls.2021.809522)
Supplement: Supplementary file 1 [file Table_1.XLSX]

## Sheet: Table S1
Table S1 List of the 185 accessions for GWAS
Ecological region: Yellow River Region (YRR), the Yangzi River Region (YZRR), The Northwest Inland Region (NIR), the Northern Specific Early-Maturity Region (NSER), and the United States (US).
Sample	Accession name	Origin	Ecological region
S1	Zhong2191	Henan	YRR
S2	Zhong40418	Henan	YRR
S3	Zhong40618	Henan	YRR
S4	Zhong40612	Henan	YRR
S5	Zhong51811	Henan	YRR
S6	CRI94A1822	Henan	YRR
S7	Zhong61832	Henan	YRR
S8	Zhong71239	Henan	YRR
S9	PB12-1-10	Henan	YRR
S10	PB12-1-7	Henan	YRR
S11	PB12-1-8	Henan	YRR
S12	Zhong1476	Henan	YRR
S13	Zhong151222	Henan	YRR
S14	Zhong152201	Henan	YRR
S15	Zhong152201SQ	Henan	YRR
S16	Zhong152214	Henan	YRR
S17	Zhong152224	Henan	YRR
S18	SS2011	Henan	YRR
S19	CQ2012-3	Henan	YRR
S20	CQ2012-4	Henan	YRR
S21	Zhong29T41	Henan	YRR
S22	Zhong29T42	Henan	YRR
S23	L426	Henan	YRR
S24	K640	Shandong	YRR
S25	N82	the United States	US
S26	P21-6-7	the United States	US
S27	Shannong SF06	Shandong	YRR
S28	sGK16	Hunan	YZRR
S29	V321-20-14	Beijing	YZRR
S30	Baimian 17	Henan	YRR
S31	Chaoaoyang 1	Azerbaijan	NSER
S32	Deltapine 20	the United States	US
S33	De 97-047	the United States	US
S34	Guannong 1	Liaoning	NSER
S35	Han2490	Hebei	YRR
S36	Han656	Hebei	YRR
S37	Han559	Hebei	YRR
S38	Han667	Hebei	YRR
S39	Han686	Hebei	YRR
S40	Han9609	Hebei	YRR
S41	Heishanmian1	Liaoning	NSER
S42	Jinmian3	Liaoning	NSER
S43	Jinmian10	Shanxi	YRR
S44	Jinmian21	Shanxi	YRR
S45	Jinmian23	Shanxi	YRR
S46	Jinmian5	Shanxi	YRR
S47	Liaomian10	Liaoning	NSER
S48	Liaomian17	Liaoning	NSER
S49	Liaomian5	Liaoning	NSER
S50	Liaomian6	Liaoning	NSER
S51	Liaomian7	Liaoning	NSER
S52	Liaomian9	Liaoning	NSER
S53	Liaoyangduanjie	Liaoning	NSER
S54	Lu154	Shandong	YRR
S55	Lumianyan19	Shandong	YRR
S56	Lumian2153	Shandong	YRR
S57	Nongken5	the North of Xinjiang	NIR
S58	Shan70	Shanxi	YRR
S59	Shizao1	Hebei	YRR
S60	Shizao2	Hebei	YRR
S61	Shizao3	Hebei	YRR
S62	Xia13-7	Henan	YRR
S63	Xia25	Henan	YRR
S64	Xiazao1	Hebei	YRR
S65	Xiazao2	Hebei	YRR
S66	Xiazao3	Hebei	YRR
S67	Xinluzao11	the North of Xinjiang	NIR
S68	Xinluzao36	the North of Xinjiang	NIR
S69	Xinluzao3	the North of Xinjiang	NIR
S70	Xinluzao42	the North of Xinjiang	NIR
S71	Xinluzao45	the North of Xinjiang	NIR
S72	Xinluzao4	the North of Xinjiang	NIR
S73	Xinluzao6	the North of Xinjiang	NIR
S74	Xinluzao8	the North of Xinjiang	NIR
S75	Xinluzao9	the North of Xinjiang	NIR
S76	Xinxiang368	Henan	YRR
S77	Yu1335	Henan	YRR
S78	Yumian12	Henan	YRR
S79	Yuzao8E13	Henan	YRR
S80	Yuzao910	Henan	YRR
S81	Jinmian57	Shanxi	YRR
S82	YunzaoN95	Shanxi	YRR
S83	Zhong416	Henan	YRR
S84	Zhong425-5	Henan	YRR
S85	Zhong716	Henan	YRR
S86	Zhong751213	Henan	YRR
S87	Zhongchuang 88	Hebei	YRR
S88	Zhongmiansuo10	Henan	YRR
S89	Zhongmiansuo14	Henan	YRR
S90	Zhongmiansuo16	Henan	YRR
S91	Zhongmiansuo20	Henan	YRR
S92	Zhongmiansuo24	Henan	YRR
S93	Zhongmiansuo27	Henan	YRR
S94	Zhongmiansuo30	Henan	YRR
S95	Zhongmiansuo36	Henan	YRR
S96	Han256	Hebei	YRR
S97	Zhongmiansuo37	Henan	YRR
S98	Zhongmiansuo42	Henan	YRR
S99	Zhongmiansuo50	Henan	YRR
S100	Zhongmiansuo58	Henan	YRR
S101	Zhongmiansuo64	Henan	YRR
S102	Zhongmiansuo74	Henan	YRR
S103	776	Henan	YRR
S104	20398	Henan	YRR
S105	61930	Henan	YRR
S106	61995	Henan	YRR
S107	102909	Henan	YRR
S108	103026	Henan	YRR
S109	103028	Henan	YRR
S110	103030	Henan	YRR
S111	103032	Henan	YRR
S112	103075	Henan	YRR
S113	103164	Henan	YRR
S114	103425	Henan	YRR
S115	103297	Henan	YRR
S116	109056	Henan	YRR
S117	SPPB12-1-7	Henan	YRR
S118	SPPB12-1-9	Henan	YRR
S119	SPPB12-2-7	Henan	YRR
S120	298	the North of Xinjiang	NIR
S121	602186	Henan	YRR
S122	CG3020-1	the United States	US
S123	CG3020-3	the United States	US
S124	FM1735	the United States	US
S125	G2005	Henan	YRR
S126	Zhongzhimian2	Beijing	YRR
S127	H109	Henan	YRR
S128	H559	Henan	YRR
S129	LIH33	Henan	YRR
S130	Phy-7	the United States	US
S131	STS458	the United States	US
S132	TM-1	the United States	US
S133	Aoshimian4406	Beijing	YRR
S134	Baimian985	Henan	YRR
S135	Cang198	Hebei	YRR
S136	Chunbeibao	Henan	YRR
S137	Chunnanbao	Henan	YRR
S138	Deltapine14	the United States	US
S139	Deltapine15	the United States	US
S140	Fanmian3	Henan	YRR
S141	Ganzao109	Jiangxi	YZRR
S142	Guoxinmian11	Hebei	YRR
S143	Han7860	Hebei	YRR
S144	Ji4025	Hebei	YRR
S145	Jinmian 26	Shanxi	YRR
S146	BM03	Henan	YRR
S147	Kelin098	Henan	YRR
S148	Liaomian23	Liaoning	NSER
S149	Liaomian27	Liaoning	NSER
S150	Liaomian28	Liaoning	NSER
S151	Lu05R59	Shandong	YRR
S152	Lu7619	Shandong	YRR
S153	Lumianyan17	Shandong	YRR
S154	Lumianyan21	Shandong	YRR
S155	Lumianyan28	Shandong	YRR
S156	Lumianyan36	Shandong	YRR
S157	Lumianyan38	Shandong	YRR
S158	Miaobao21	Shandong	YRR
S159	Renhe39	Shandong	YRR
S160	Rihuimian6	Anhui	YZRR
S161	ShannongSF01	Shandong	YRR
S162	Shan79	Shanxi	YRR
S163	Stoneville 2B	the United States	US
S164	Xinmian 33B	the United States	US
S165	Xinzhimian5	Henan	YRR
S166	Yinhuashu	Shandong	YRR
S167	You009	Henan	YRR
S168	Zhong109	Henan	YRR
S169	Zhongmiansuo17	Henan	YRR
S170	Zhongmiansuo19	Henan	YRR
S171	Zhongmiansuo43	Henan	YRR
S172	Zhongmiansuo60	Henan	YRR
S173	Zhong662	Henan	YRR
S174	Zhong679	the North of Xinjiang	NIR
S175	Zhong69	Henan	YRR
S176	Zhong800319	Shandong	YRR
S177	Zhongmiansuo 94A915	Henan	YRR
S178	Zhongmiansuo12	Henan	YRR
S179	Zhongmiansuo35	Henan	YRR
S180	Zhongmiansuo41	Henan	YRR
S181	Zhongmiansuo45	Henan	YRR
S182	Zhongmiansuo49	Henan	YRR
S183	Zhongmiansuo7	Henan	YRR
S184	Zhongzhimian 8	Beijing	YRR
S185	Zhongzhimian GD89	Beijing	YRR

## Sheet: Table S2
Table S2 The variation of the average of nine senescence-related traits and heritability of each trait (excepted RDBW)
Trait	Mean	Min	Max	SD	CV	H2 ± SE
SPAD0d	50.82	42.6	59.63	2.76	0.05	0.66 ± 0.07
SPAD10d	52.46	40.78	61.28	3.65	0.07	0.57 ± 0.07
SPAD20d	49.49	30.78	60.21	5.57	0.11	0.61 ± 0.08
RSPAD	-0.03	-0.56	0.22	0.13	-2.58	0.53 ± 0.09
NAWF0d	5.16	3.09	6.97	0.87	0.18	0.86 ± 0.05
NAWF7d	4.06	1.68	6.01	0.94	0.27	0.85 ± 0.05
NB	5.01	2.1	9.08	1.44	0.28	0.53 ± 0.09
RDBW	0.16	-0.38	0.43	0.11	0.72
CV, coefficient of variation; H2, broad sense heritability.

## Sheet: Table S3
Table S3 List of all QTNs associtated with senesence related traits (LOD > 3)
QTN	Trait	Chromosome	Position (bp)	QTN effect	LOD score	'-log10(P)'	r2 (%)	MAF	Genotype for code 1
Ghir_A01_7318612	C2014RDBW	Ghir_A01	7318612	0.0243	3.7055	4.442	6.8591	0.4208	A
Ghir_A01_21030291	C2013NB	Ghir_A01	21030291	0.6143	3.9008	4.6474	6.2548	0.3197	G
Ghir_A01_28874308	X2013RSPAD	Ghir_A01	28874308	-0.2761	3.548	4.2759	7.8832	0.4945	G
Ghir_A01_78849182	C2014NAWF0d	Ghir_A01	78849182	0.1746	3.4377	4.1594	3.9024	0.2869	T
Ghir_A01_79769903	X2014NAWF0d	Ghir_A01	79769903	0.1591	3.1901	3.8973	4.6062	0.3142	T
Ghir_A01_99116992	NAWF7d_blup	Ghir_A01	99116992	0.1484	5.0253	5.8224	2.8951	0.276	A
Ghir_A01_113886776	C2013SPAD10d	Ghir_A01	113886776	-2.0562	6.8425	7.7024	5.8011	0.0792	T
Ghir_A02_58059481	C2014NAWF0d	Ghir_A02	58059481	0.3085	5.109	5.9095	8.0818	0.1585	G
Ghir_A02_64006191	C2013NAWF7d	Ghir_A02	64006191	-0.2095	3.4371	4.1588	3.488	0.3333	T
Ghir_A02_76068276	X2013SPAD20d	Ghir_A02	76068276	-42.4498	16.5092	17.5527	43.5392	0.4973	A
Ghir_A02_76068276	X2013RSPAD	Ghir_A02	76068276	-0.9903	19.5063	20.585	50.9998	0.4973	A
Ghir_A02_100822424	X2014RSPAD	Ghir_A02	100822424	0.0326	5.0519	5.8501	7.9831	0.2928	T
Ghir_A02_106204996	SPAD10d_blup	Ghir_A02	106204996	0.4628	5.734	6.5578	6.7826	0.2404	T
Ghir_A02_106204996	C2013SPAD10d	Ghir_A02	106204996	1.2278	4.9241	5.7172	4.814	0.2404	T
Ghir_A02_106301754	C2013NAWF0d	Ghir_A02	106301754	0.1738	3.1663	3.872	2.6888	0.3388	A
Ghir_A02_106821869	C2014SPAD20d	Ghir_A02	106821869	2.5716	4.3552	5.1237	9.3967	0.1209	T
Ghir_A02_107020042	X2014RSPAD	Ghir_A02	107020042	0.0379	5.2796	6.0867	7.5026	0.1713	A
Ghir_A03_583459	X2014RSPAD	Ghir_A03	583459	0.049	3.4213	4.1421	8.205	0.0691	C
Ghir_A03_646535	X2014NAWF7d	Ghir_A03	646535	-0.1849	5.1342	5.9357	3.6249	0.2308	G
Ghir_A03_646535	NAWF0d_blup	Ghir_A03	646535	-0.1522	4.206	4.9675	3.0034	0.235	G
Ghir_A03_18297563	C2014SPAD10d	Ghir_A03	18297563	-0.9645	6.9013	7.7629	6.4585	0.4536	C
Ghir_A03_38819681	SPAD10d_blup	Ghir_A03	38819681	0.515	5.337	6.1463	9.2957	0.2923	A
Ghir_A03_55066719	X2013SPAD10d	Ghir_A03	55066719	-0.8011	3.5531	4.2813	5.3235	0.2814	G
Ghir_A03_97729049	X2014RSPAD	Ghir_A03	97729049	-0.0432	7.2541	8.1259	7.9068	0.1796	T
Ghir_A03_97729049	X2014SPAD20d	Ghir_A03	97729049	-1.9837	5.0705	5.8694	7.0348	0.1841	T
Ghir_A03_102816660	C2013NAWF7d	Ghir_A03	102816660	0.3652	6.5121	7.3618	3.5521	0.0874	T
Ghir_A03_105854123	X2014NB	Ghir_A03	105854123	0.3391	5.3858	6.1969	6.3079	0.1913	A
Ghir_A03_105985149	X2013SPAD20d	Ghir_A03	105985149	2.7467	5.5752	6.3933	4.8504	0.1421	G
Ghir_A04_2911025	X2014RSPAD	Ghir_A04	2911025	-0.0355	3.2721	3.9842	9.4562	0.3564	C
Ghir_A04_5776622	C2014SPAD10d	Ghir_A04	5776622	-1.6731	8.4284	9.3312	11.1075	0.1475	C
Ghir_A04_27543753	X2013SPAD10d	Ghir_A04	27543753	-1.8623	3.5783	4.3079	10.2649	0.4536	A
Ghir_A04_75415595	NAWF0d_blup	Ghir_A04	75415595	0.101	3.231	3.9406	2.2464	0.4754	C
Ghir_A04_80047969	X2014NB	Ghir_A04	80047969	0.3332	4.6983	5.4819	4.6165	0.1694	G
Ghir_A04_80481631	X2014NAWF0d	Ghir_A04	80481631	-0.126	3.3904	4.1094	2.8667	0.4918	T
Ghir_A04_82711366	SPAD0d_blup	Ghir_A04	82711366	0.2733	3.0258	3.7227	3.8202	0.3634	A
Ghir_A04_83383176	C2014SPAD10d	Ghir_A04	83383176	-1.2597	3.9652	4.715	1.2186	0.1694	G
Ghir_A05_18213066	X2014NB	Ghir_A05	18213066	-0.2979	4.2299	4.9926	3.7964	0.1967	A
Ghir_A05_22111879	X2013SPAD0d	Ghir_A05	22111879	0.5271	3.0716	3.7714	3.9747	0.3962	A
Ghir_A05_29636635	X2013SPAD0d	Ghir_A05	29636635	-1.0297	8.2809	9.18	8.363	0.123	A
Ghir_A05_31543877	C2013SPAD10d	Ghir_A05	31543877	1.112	3.3827	4.1013	4.3379	0.3033	T
Ghir_A05_31725658	X2013SPAD20d	Ghir_A05	31725658	3.1835	5.626	6.446	5.8504	0.1148	G
Ghir_A05_31725658	X2013RSPAD	Ghir_A05	31725658	0.0562	4.0665	4.8213	3.9234	0.1148	G
Ghir_A05_33314453	X2014NB	Ghir_A05	33314453	0.5018	4.5036	5.2788	15.6628	0.377	C
Ghir_A05_42577814	C2013SPAD10d	Ghir_A05	42577814	-1.4184	3.515	4.2411	6.1199	0.3743	T
Ghir_A05_95560386	X2013SPAD0d	Ghir_A05	95560386	0.8886	5.1714	5.9743	0.8225	0.3005	T
Ghir_A05_98352876	C2014SPAD0d	Ghir_A05	98352876	0.8038	4.1925	4.9534	6.9391	0.4235	G
Ghir_A05_98616653	SPAD0d_blup	Ghir_A05	98616653	0.3889	7.8818	8.7707	7.0614	0.3525	C
Ghir_A05_98629562	X2013SPAD10d	Ghir_A05	98629562	0.9336	7.6267	8.5089	6.8281	0.3852	T
Ghir_A05_102954044	SPAD20d_blup	Ghir_A05	102954044	0.5675	4.1773	4.9375	3.9736	0.4973	C
Ghir_A05_109124958	X2013SPAD10d	Ghir_A05	109124958	1.2296	6.3166	7.1601	11.9162	0.224	C
Ghir_A06_16888073	SPAD0d_blup	Ghir_A06	16888073	0.3635	5.072	5.871	6.841	0.4918	T
Ghir_A06_17006548	X2014NB	Ghir_A06	17006548	0.2993	5.4106	6.2227	7.2477	0.4208	C
Ghir_A06_78403708	C2014RDBW	Ghir_A06	78403708	-0.0607	4.8074	5.5956	23.9035	0.1311	C
Ghir_A06_93291979	X2013RSPAD	Ghir_A06	93291979	0.0887	9.2707	10.1932	10.0652	0.1257	C
Ghir_A06_114904847	C2014NB	Ghir_A06	114904847	0.3648	4.9864	5.782	9.0575	0.1448	T
Ghir_A07_8962548	C2014RSPAD	Ghir_A07	8962548	0.0553	3.7515	4.4904	10.1575	0.0907	A
Ghir_A07_52972874	X2013RSPAD	Ghir_A07	52972874	0.0476	3.9061	4.653	1.6309	0.0792	T
Ghir_A07_55400435	SPAD20d_blup	Ghir_A07	55400435	0.7309	4.0232	4.7759	6.1396	0.2787	G
Ghir_A07_62913353	X2014SPAD20d	Ghir_A07	62913353	1.7812	8.0077	8.8999	9.5765	0.2857	T
Ghir_A07_95015589	SPAD0d_blup	Ghir_A07	95015589	-0.3657	3.1667	3.8724	6.1424	0.4454	T
Ghir_A08_754201	SPAD20d_blup	Ghir_A08	754201	-0.5266	4.39	5.1601	3.5481	0.4098	G
Ghir_A08_1753471	X2014NAWF0d	Ghir_A08	1753471	-0.1485	3.2467	3.9573	3.2267	0.2377	C
Ghir_A08_3592145	RSPAD_blup	Ghir_A08	3592145	-0.0103	3.4422	4.1642	5.2764	0.4235	A
Ghir_A08_5711855	C2014RDBW	Ghir_A08	5711855	-0.0205	3.0232	3.7199	4.7908	0.3579	G
Ghir_A08_8309665	C2014SPAD20d	Ghir_A08	8309665	3.5862	6.1337	6.9712	11.6545	0.0632	A
Ghir_A08_8815321	SPAD10d_blup	Ghir_A08	8815321	0.7836	5.2087	6.0131	7.0856	0.0683	G
Ghir_A08_11055067	C2014SPAD0d	Ghir_A08	11055067	0.946	3.208	3.9162	7.2361	0.1612	G
Ghir_A08_24953278	C2014SPAD10d	Ghir_A08	24953278	-2.5839	8.7073	9.6168	8.0674	0.0437	G
Ghir_A08_50699224	RSPAD_blup	Ghir_A08	50699224	0.0139	3.2792	3.9917	8.7601	0.3743	T
Ghir_A08_62005587	X2014SPAD20d	Ghir_A08	62005587	-1.4912	5.0626	5.8612	7.4705	0.3324	C
Ghir_A08_87578298	C2013NAWF0d	Ghir_A08	87578298	0.3453	4.7974	5.5852	1.9001	0.0574	A
Ghir_A08_106352489	C2014RSPAD	Ghir_A08	106352489	0.0437	3.7387	4.4769	9.2553	0.1429	A
Ghir_A08_106387975	C2014SPAD20d	Ghir_A08	106387975	2.0262	4.2727	5.0374	7.8195	0.1676	A
Ghir_A08_115928565	X2014SPAD0d	Ghir_A08	115928565	-0.6881	3.7249	4.4624	5.6068	0.4891	G
Ghir_A09_3532427	NAWF7d_blup	Ghir_A09	3532427	0.1229	5.5909	6.4096	1.9877	0.2814	G
Ghir_A09_4957600	X2014NAWF7d	Ghir_A09	4957600	0.1352	3.465	4.1883	2.7379	0.3489	C
Ghir_A09_10201274	SPAD10d_blup	Ghir_A09	10201274	0.4055	3.6026	4.3335	5.6292	0.2842	C
Ghir_A09_15552984	SPAD0d_blup	Ghir_A09	15552984	-0.3604	4.9479	5.7419	6.0627	0.3634	G
Ghir_A09_15562085	X2013SPAD0d	Ghir_A09	15562085	-0.6579	3.4029	4.1226	6.0245	0.3333	T
Ghir_A09_45698345	X2013SPAD10d	Ghir_A09	45698345	1.8913	3.5058	4.2314	1.9231	0.4672	G
Ghir_A09_53563952	C2013SPAD10d	Ghir_A09	53563952	-6.4341	5.3057	6.1138	13.6809	0.4918	G
Ghir_A09_54447174	C2014SPAD0d	Ghir_A09	54447174	1.0456	3.7475	4.4862	8.1507	0.1639	T
Ghir_A09_60991018	C2013SPAD0d	Ghir_A09	60991018	0.7336	3.7631	4.5026	4.3364	0.265	G
Ghir_A09_79869547	C2014SPAD20d	Ghir_A09	79869547	2.0569	3.1992	3.9069	8.5523	0.1896	A
Ghir_A10_21468584	X2014SPAD0d	Ghir_A10	21468584	0.8037	4.066	4.8208	7.6475	0.3115	A
Ghir_A10_34958459	C2013SPAD10d	Ghir_A10	34958459	1.7497	4.0045	4.7563	2.9012	0.0492	A
Ghir_A10_34961391	nb_blup	Ghir_A10	34961391	0.2322	3.9162	4.6636	6.0874	0.1393	C
Ghir_A10_41327378	nb_blup	Ghir_A10	41327378	-0.4945	3.3651	4.0827	0	0.4617	G
Ghir_A10_53696052	X2013SPAD10d	Ghir_A10	53696052	1.8692	4.6144	5.3944	14.2224	0.4317	T
Ghir_A10_68958398	NAWF7d_blup	Ghir_A10	68958398	-0.1868	4.7449	5.5305	2.2963	0.0792	G
Ghir_A10_69117130	NAWF0d_blup	Ghir_A10	69117130	-0.1726	3.7247	4.4622	3.045	0.0929	C
Ghir_A10_69721399	C2014NAWF7d	Ghir_A10	69721399	-0.4488	4.5039	5.2791	8.5416	0.1202	G
Ghir_A10_89672670	X2014NAWF7d	Ghir_A10	89672670	-0.2222	4.141	4.8994	1.3673	0.1786	A
Ghir_A10_103123701	X2013RSPAD	Ghir_A10	103123701	0.0428	4.1241	4.8817	1.9959	0.123	C
Ghir_A11_5454381	C2014RDBW	Ghir_A11	5454381	-0.0348	3.1565	3.8616	9.5296	0.153	T
Ghir_A11_11486881	X2014SPAD10d	Ghir_A11	11486881	-1.2422	4.2532	5.017	13.6851	0.2158	A
Ghir_A11_20015216	X2014SPAD10d	Ghir_A11	20015216	-0.7305	3.2723	3.9844	4.7921	0.3907	G
Ghir_A11_69803292	C2013NB	Ghir_A11	69803292	3.6131	4.9412	5.7349	5.8262	0.4973	C
Ghir_A11_78539846	C2014NAWF0d	Ghir_A11	78539846	0.4806	5.9595	6.7912	13.562	0.4508	G
Ghir_A11_106685862	X2013SPAD10d	Ghir_A11	106685862	1.1457	4.4021	5.1727	5.5139	0.1202	G
Ghir_A11_106685862	C2014SPAD10d	Ghir_A11	106685862	1.2277	3.8086	4.5505	5.4869	0.1202	G
Ghir_A11_112414298	C2014NAWF7d	Ghir_A11	112414298	-0.3539	4.7975	5.5853	8.8436	0.2978	C
Ghir_A11_112521540	X2014SPAD20d	Ghir_A11	112521540	-1.3088	4.238	5.001	5.2606	0.2995	A
Ghir_A11_119723215	C2014NB	Ghir_A11	119723215	-0.2266	3.1062	3.8082	4.1624	0.2432	A
Ghir_A11_120694210	C2013RSPAD	Ghir_A11	120694210	-0.0334	3.5208	4.2472	6.2415	0.3825	C
Ghir_A11_122087468	C2013SPAD10d	Ghir_A11	122087468	1.1192	3.7731	4.5131	3.3759	0.1667	C
Ghir_A12_833108	C2014NAWF0d	Ghir_A12	833108	-0.2925	4.7833	5.5705	8.4358	0.1885	A
Ghir_A12_983736	X2014RSPAD	Ghir_A12	983736	-0.0412	5.7074	6.5303	7.6262	0.1436	G
Ghir_A12_8318493	X2013SPAD20d	Ghir_A12	8318493	1.7334	3.6694	4.4039	3.0325	0.3142	T
Ghir_A12_49362905	X2014RDBW	Ghir_A12	49362905	0.1652	4.9975	5.7935	18.6129	0.0355	C
Ghir_A12_79005173	C2014NAWF0d	Ghir_A12	79005173	-0.2258	4.4897	5.2642	4.956	0.1967	C
Ghir_A13_2895563	C2013RSPAD	Ghir_A13	2895563	0.0402	6.1836	7.0228	9.0634	0.4153	T
Ghir_A13_5548353	X2014NAWF7d	Ghir_A13	5548353	0.1809	8.1706	9.067	5.2976	0.3901	C
Ghir_A13_60380161	X2014NAWF7d	Ghir_A13	60380161	0.2574	3.6918	4.4275	0	0.1538	T
Ghir_A13_66842132	C2013NAWF7d	Ghir_A13	66842132	0.3637	3.6916	4.4273	0	0.0847	G
Ghir_A13_80687347	C2013SPAD20d	Ghir_A13	80687347	1.9544	3.9196	4.6671	7.6051	0.3415	A
Ghir_A13_81609729	C2013RSPAD	Ghir_A13	81609729	0.0511	7.6067	8.4883	12.6695	0.2514	T
Ghir_A13_103123055	X2013SPAD0d	Ghir_A13	103123055	-0.8692	4.8196	5.6083	11.2424	0.3306	T
Ghir_D01_448139	X2014NB	Ghir_D01	448139	0.3247	4.4691	5.2427	4.7598	0.153	A
Ghir_D01_4636440	C2014NAWF7d	Ghir_D01	4636440	-0.7993	7.3779	8.2532	15.7554	0.0601	C
Ghir_D01_4832775	C2013NAWF0d	Ghir_D01	4832775	0.2153	3.0181	3.7145	2.015	0.1148	C
Ghir_D01_5131790	X2014SPAD0d	Ghir_D01	5131790	-0.8234	3.2301	3.9397	7.4769	0.4508	A
Ghir_D01_16366499	C2014SPAD0d	Ghir_D01	16366499	-1.5213	4.103	4.8596	8.3806	0.071	C
Ghir_D01_45419659	SPAD10d_blup	Ghir_D01	45419659	-0.5311	4.6942	5.4777	8.7244	0.2022	T
Ghir_D01_45419668	SPAD20d_blup	Ghir_D01	45419668	-1.0084	7.9599	8.8509	12.6899	0.3251	G
Ghir_D01_45878613	NAWF7d_blup	Ghir_D01	45878613	-0.1223	4.0764	4.8317	1.7765	0.1858	C
Ghir_D01_46206777	X2013SPAD0d	Ghir_D01	46206777	1.0437	3.9557	4.7051	9.1358	0.1284	G
Ghir_D01_56013926	X2013SPAD0d	Ghir_D01	56013926	0.9265	6.5147	7.3645	9.8365	0.2104	C
Ghir_D01_57260066	C2013SPAD0d	Ghir_D01	57260066	-0.7951	4.0892	4.8451	6.0821	0.4126	A
Ghir_D01_58148940	C2013SPAD20d	Ghir_D01	58148940	-2.1633	4.1095	4.8664	9.6956	0.3716	G
Ghir_D01_63056705	C2014NB	Ghir_D01	63056705	0.27	4.1443	4.9029	5.2029	0.2678	C
Ghir_D02_2820490	X2013SPAD10d	Ghir_D02	2820490	-1.5308	6.3254	7.1692	8.5969	0.0956	G
Ghir_D02_3293214	C2014SPAD10d	Ghir_D02	3293214	1.2359	3.2179	3.9267	4.4888	0.0792	T
Ghir_D02_10574454	X2013RSPAD	Ghir_D02	10574454	-0.0563	6.9097	7.7716	2.9604	0.123	A
Ghir_D02_10845792	SPAD10d_blup	Ghir_D02	10845792	0.4477	4.6734	5.456	5.2623	0.2377	G
Ghir_D02_10946792	SPAD20d_blup	Ghir_D02	10946792	-0.5973	5.4235	6.236	4.561	0.4727	C
Ghir_D02_33789980	C2014NAWF0d	Ghir_D02	33789980	0.2523	4.1941	4.9551	7.2573	0.3852	T
Ghir_D02_61376598	C2014NAWF7d	Ghir_D02	61376598	-0.5654	3.7404	4.4787	10.0413	0.0765	C
Ghir_D02_63372137	NAWF7d_blup	Ghir_D02	63372137	-0.1043	3.4582	4.1811	1.6067	0.2568	A
Ghir_D02_63459257	NAWF0d_blup	Ghir_D02	63459257	-0.1273	5.5524	6.3697	3.0361	0.2705	T
Ghir_D03_4048438	C2013SPAD0d	Ghir_D03	4048438	-1.0548	3.4551	4.1778	5.1844	0.1148	A
Ghir_D03_7929445	C2013SPAD10d	Ghir_D03	7929445	1.8589	9.4106	10.3362	11.2772	0.276	C
Ghir_D03_14657397	NAWF7d_blup	Ghir_D03	14657397	0.1539	3.5998	4.3306	4.1103	0.3443	A
Ghir_D03_18673734	X2014SPAD20d	Ghir_D03	18673734	1.9368	4.9073	5.6997	12.1104	0.3297	C
Ghir_D03_24825157	C2014NAWF0d	Ghir_D03	24825157	0.3528	7.4805	8.3587	14.9545	0.3251	T
Ghir_D03_37952328	C2013NAWF0d	Ghir_D03	37952328	0.5249	14.4844	15.5003	26.307	0.4044	C
Ghir_D03_37952328	C2013NAWF7d	Ghir_D03	37952328	0.4686	9.819	10.7535	17.3701	0.4044	C
Ghir_D03_37952328	NAWF0d_blup	Ghir_D03	37952328	0.2499	10.5088	11.4574	14.0275	0.4044	C
Ghir_D03_37952328	NAWF7d_blup	Ghir_D03	37952328	0.3031	13.5595	14.5615	16.269	0.4044	C
Ghir_D03_37952328	nb_blup	Ghir_D03	37952328	0.2931	5.7298	6.5535	17.2348	0.4044	C
Ghir_D03_38361459	RSPAD_blup	Ghir_D03	38361459	0.017	3.5372	4.2645	13.4247	0.276	C
Ghir_D04_4054376	SPAD20d_blup	Ghir_D04	4054376	1.043	3.823	4.5656	7.7655	0.1202	C
Ghir_D04_4146406	C2014NB	Ghir_D04	4146406	0.3609	3.779	4.5193	6.1007	0.1257	C
Ghir_D04_30743366	C2014NAWF0d	Ghir_D04	30743366	-0.2478	4.2739	5.0386	6.9383	0.3907	T
Ghir_D04_30743366	NAWF0d_blup	Ghir_D04	30743366	-0.1305	3.2018	3.9097	3.3499	0.3907	T
Ghir_D04_55741127	C2014NB	Ghir_D04	55741127	-0.439	3.5471	4.275	4.8826	0.0574	C
Ghir_D04_55741127	X2014RDBW	Ghir_D04	55741127	0.0971	3.7008	4.437	11.5358	0.0574	C
Ghir_D05_4933229	NAWF7d_blup	Ghir_D05	4933229	0.1042	4.9999	5.796	1.7413	0.3634	G
Ghir_D05_19417997	C2014NAWF0d	Ghir_D05	19417997	0.3043	4.0198	4.7723	4.0185	0.071	G
Ghir_D05_38025528	C2014SPAD0d	Ghir_D05	38025528	1.4982	4.1994	4.9606	9.5814	0.071	A
Ghir_D05_50758513	C2013SPAD0d	Ghir_D05	50758513	-0.7948	3.4575	4.1804	6.0409	0.4399	C
Ghir_D05_51718438	X2013RSPAD	Ghir_D05	51718438	0.0278	3.3892	4.1082	1.5804	0.2951	G
Ghir_D06_3818390	C2014NB	Ghir_D06	3818390	-0.1964	3.724	4.4614	3.3052	0.3962	A
Ghir_D06_9820864	C2014SPAD10d	Ghir_D06	9820864	1.5696	5.7103	6.5333	6.9374	0.0847	C
Ghir_D06_12228684	X2014SPAD0d	Ghir_D06	12228684	-0.7448	3.8807	4.6263	6.5465	0.4016	C
Ghir_D06_27428670	SPAD0d_blup	Ghir_D06	27428670	-0.5372	10.0858	11.0259	13.8549	0.3197	C
Ghir_D06_31884617	C2013SPAD10d	Ghir_D06	31884617	-1.6005	7.6192	8.5011	9.7919	0.3306	G
Ghir_D06_37918762	X2013SPAD10d	Ghir_D06	37918762	-0.7657	4.2573	5.0212	4.4028	0.3033	G
Ghir_D06_39884230	C2014SPAD20d	Ghir_D06	39884230	-1.6168	3.4341	4.1556	4.5453	0.1593	C
Ghir_D06_52889190	C2014SPAD10d	Ghir_D06	52889190	1.0031	3.2665	3.9783	2.3214	0.0792	T
Ghir_D06_54933781	SPAD0d_blup	Ghir_D06	54933781	0.6226	5.4047	6.2165	6.7238	0.071	T
Ghir_D06_63510645	nb_blup	Ghir_D06	63510645	-0.1941	3.6127	4.3442	6.2344	0.2541	A
Ghir_D06_65670995	X2014SPAD10d	Ghir_D06	65670995	-0.6825	4.7205	5.5051	4.8986	0.4071	G
Ghir_D07_6301121	X2013SPAD20d	Ghir_D07	6301121	2.6431	3.0676	3.7672	2.8932	0.0792	T
Ghir_D07_14548719	C2014SPAD10d	Ghir_D07	14548719	1.2595	5.1102	5.9107	8.7794	0.2131	C
Ghir_D07_14927851	X2014NAWF7d	Ghir_D07	14927851	-0.1385	3.467	4.1904	2.6837	0.272	G
Ghir_D07_21358876	X2013SPAD10d	Ghir_D07	21358876	1.2092	3.0959	3.7972	3.2194	0.0656	C
Ghir_D07_23255660	C2013RSPAD	Ghir_D07	23255660	0.0365	5.5704	6.3883	7.527	0.459	A
Ghir_D07_56337769	SPAD0d_blup	Ghir_D07	56337769	0.3905	3.5755	4.3049	3.4505	0.1038	A
Ghir_D07_56337769	C2013SPAD0d	Ghir_D07	56337769	1.319	3.7046	4.441	7.306	0.1038	A
Ghir_D07_58566386	SPAD20d_blup	Ghir_D07	58566386	1.1513	5.3041	6.1121	5.6601	0.0765	C
Ghir_D08_2377886	C2013SPAD0d	Ghir_D08	2377886	1.1006	5.2946	6.1023	9.8628	0.2705	A
Ghir_D08_2889474	C2013SPAD10d	Ghir_D08	2889474	-1.1529	3.3652	4.0828	2.3442	0.1148	T
Ghir_D08_8529441	NAWF7d_blup	Ghir_D08	8529441	0.0813	3.1694	3.8753	1.1739	0.429	C
Ghir_D08_11351414	C2013NAWF7d	Ghir_D08	11351414	0.2033	3.2854	3.9983	2.5689	0.2077	A
Ghir_D08_21639420	X2014SPAD0d	Ghir_D08	21639420	0.751	3.6477	4.3811	6.5206	0.3716	C
Ghir_D08_25049612	C2013NAWF0d	Ghir_D08	25049612	0.381	4.1191	4.8765	4.1656	0.0656	C
Ghir_D08_42547259	X2014RSPAD	Ghir_D08	42547259	-0.0463	4.8666	5.6573	9.9175	0.1381	C
Ghir_D08_46379479	X2014NB	Ghir_D08	46379479	-0.2906	5.2283	6.0334	6.1408	0.3716	A
Ghir_D08_47855544	SPAD20d_blup	Ghir_D08	47855544	0.9669	5.4729	6.2873	9.6679	0.2077	A
Ghir_D08_48114050	X2013SPAD20d	Ghir_D08	48114050	2.3663	4.5652	5.3431	4.3412	0.1831	C
Ghir_D08_50476783	NAWF7d_blup	Ghir_D08	50476783	0.1047	3.8558	4.6001	1.732	0.4235	A
Ghir_D08_50512237	C2014NAWF7d	Ghir_D08	50512237	0.2934	4.0518	4.8059	6.0331	0.388	A
Ghir_D08_53271417	C2014RSPAD	Ghir_D08	53271417	0.0318	3.9894	4.7404	8.3075	0.3901	C
Ghir_D08_55737967	X2014NAWF0d	Ghir_D08	55737967	0.1953	4.1704	4.9302	5.7807	0.2459	A
Ghir_D08_56382900	NAWF7d_blup	Ghir_D08	56382900	0.1152	3.2145	3.9231	1.8473	0.2268	T
Ghir_D08_66549970	C2014SPAD20d	Ghir_D08	66549970	-1.8467	4.1122	4.8693	7.1473	0.1951	A
Ghir_D09_8742948	C2013SPAD0d	Ghir_D09	8742948	-2.1309	5.8377	6.6652	18.3518	0.0984	T
Ghir_D09_15921779	X2013SPAD0d	Ghir_D09	15921779	1.4388	5.168	5.9708	11.8714	0.0765	A
Ghir_D09_21365536	C2014SPAD10d	Ghir_D09	21365536	1.505	6.2707	7.1127	6.9304	0.1066	G
Ghir_D09_24730592	X2014SPAD20d	Ghir_D09	24730592	1.828	4.2845	5.0497	8.9281	0.206	A
Ghir_D09_36277820	X2014NB	Ghir_D09	36277820	0.429	5.1051	5.9054	4.1664	0.112	T
Ghir_D09_38545075	X2014NAWF7d	Ghir_D09	38545075	0.1286	4.3239	5.0909	2.7732	0.2775	G
Ghir_D09_41383333	X2014NAWF0d	Ghir_D09	41383333	-0.2217	5.1831	5.9865	8.841	0.265	G
Ghir_D09_43228593	C2013NB	Ghir_D09	43228593	0.7945	7.0628	7.9292	12.8986	0.388	A
Ghir_D09_49325607	C2014NAWF0d	Ghir_D09	49325607	0.1936	3.8845	4.6303	3.9863	0.2432	A
Ghir_D09_51751615	C2014RSPAD	Ghir_D09	51751615	0.0592	4.6686	5.451	9.651	0.0714	G
Ghir_D10_12245874	X2014SPAD0d	Ghir_D10	12245874	1.216	3.6308	4.3633	17.8749	0.2404	A
Ghir_D10_23320703	X2013SPAD20d	Ghir_D10	23320703	3.7637	5.8857	6.7148	6.4064	0.0929	G
Ghir_D10_23320703	X2013RSPAD	Ghir_D10	23320703	0.0526	3.0353	3.7328	2.688	0.0929	G
Ghir_D10_23867623	C2013SPAD10d	Ghir_D10	23867623	1.0931	4.9144	5.7071	4.5674	0.3743	T
Ghir_D10_29174005	X2013SPAD20d	Ghir_D10	29174005	-1.9524	4.1431	4.9016	2.7961	0.1885	T
Ghir_D10_59515079	C2014SPAD10d	Ghir_D10	59515079	1.1999	4.6544	5.4361	5.7131	0.1339	G
Ghir_D10_59819745	C2013SPAD10d	Ghir_D10	59819745	-1.8958	7.2403	8.1118	4.1836	0.0792	C
Ghir_D10_60320985	X2014SPAD10d	Ghir_D10	60320985	0.6595	3.0433	3.7413	4.769	0.3798	G
Ghir_D10_62233056	C2013SPAD10d	Ghir_D10	62233056	-1.5256	4.9077	5.7001	6.4873	0.2077	A
Ghir_D10_63067182	X2014NAWF0d	Ghir_D10	63067182	0.3275	3.5123	4.2382	12.0635	0.4044	T
Ghir_D10_63067182	X2014NAWF7d	Ghir_D10	63067182	0.2096	3.1658	3.8715	5.1213	0.4038	T
Ghir_D10_67478024	C2013RSPAD	Ghir_D10	67478024	0.0345	3.3232	4.0383	5.8005	0.2842	A
Ghir_D10_67478024	C2013SPAD20d	Ghir_D10	67478024	1.8166	3.5172	4.2434	5.9487	0.2842	A
Ghir_D10_67634500	SPAD10d_blup	Ghir_D10	67634500	0.496	4.6757	5.4584	5.9719	0.1858	A
Ghir_D11_5411462	NAWF7d_blup	Ghir_D11	5411462	-0.1268	5.1499	5.952	2.7887	0.3443	G
Ghir_D11_12212988	SPAD0d_blup	Ghir_D11	12212988	-0.2473	3.8609	4.6055	3.0763	0.459	T
Ghir_D11_24929043	C2013SPAD20d	Ghir_D11	24929043	1.7736	3.0679	3.7675	6.5709	0.429	C
Ghir_D11_54200015	NAWF7d_blup	Ghir_D11	54200015	-0.1359	4.2543	5.0181	2.3907	0.1776	T
Ghir_D11_56578201	SPAD10d_blup	Ghir_D11	56578201	0.412	3.8931	4.6393	5.1855	0.2049	A
Ghir_D11_69693790	SPAD0d_blup	Ghir_D11	69693790	0.3231	3.0348	3.7323	5.412	0.4153	A
Ghir_D11_72207131	SPAD20d_blup	Ghir_D11	72207131	0.7811	6.5246	7.3747	7.6845	0.4672	C
Ghir_D11_72207131	X2014SPAD20d	Ghir_D11	72207131	1.6185	3.3585	4.0757	8.9446	0.4643	C
Ghir_D12_3203258	C2013NAWF7d	Ghir_D12	3203258	-0.1665	3.6338	4.3664	1.9544	0.3634	C
Ghir_D12_10013024	X2013SPAD20d	Ghir_D12	10013024	3.7833	6.4104	7.2569	5.0823	0.0738	G
Ghir_D12_10013024	RSPAD_blup	Ghir_D12	10013024	0.0248	5.1271	5.9283	9.6669	0.0738	G
Ghir_D12_47559814	SPAD10d_blup	Ghir_D12	47559814	-0.812	5.5411	6.358	14.9691	0.1311	G
Ghir_D12_59658403	C2014SPAD0d	Ghir_D12	59658403	1.0553	5.036	5.8336	10.9361	0.2295	A
Ghir_D13_148624	C2013RSPAD	Ghir_D13	148624	0.058	4.2223	4.9846	7.958	0.1038	T
Ghir_D13_4474587	X2014SPAD10d	Ghir_D13	4474587	1.1518	4.812	5.6004	8.3209	0.1311	T
Ghir_D13_43987876	C2013NAWF0d	Ghir_D13	43987876	-0.2414	5.023	5.8201	3.805	0.2295	G
Ghir_D13_44027438	X2014SPAD10d	Ghir_D13	44027438	-1.2768	3.6538	4.3875	11.7302	0.2377	C
Ghir_D13_52294637	C2014RDBW	Ghir_D13	52294637	-0.025	3.5235	4.2501	6.9265	0.4863	G
Ghir_D13_52343086	C2014RSPAD	Ghir_D13	52343086	0.0357	4.9179	5.7107	9.9669	0.467	T
Ghir_D13_59845157	NAWF7d_blup	Ghir_D13	59845157	-0.1034	3.9951	4.7464	1.9071	0.4153	C
Ghir_D13_60292895	C2013NAWF7d	Ghir_D13	60292895	0.2173	5.8756	6.7044	3.6856	0.3798	A
Ghir_D13_60292895	NAWF0d_blup	Ghir_D13	60292895	0.126	5.002	5.7982	3.5166	0.3798	A

## Sheet: Table S4
Table S4 List of significant and stable QTNs for each traits.
Trait	QTN	Chromosome	Position (bp)
SPAD0d	Ghir_A04_82711366	Ghir_A04	82711366
	Ghir_A05_98616653	Ghir_A05	98616653
	Ghir_A06_16888073	Ghir_A06	16888073
	Ghir_A07_95015589	Ghir_A07	95015589
	Ghir_A09_15552984	Ghir_A09	15552984
	Ghir_D06_27428670	Ghir_D06	27428670
	Ghir_D06_54933781	Ghir_D06	54933781
	Ghir_D07_56337769	Ghir_D07	56337769
	Ghir_D11_12212988	Ghir_D11	12212988
	Ghir_D11_69693790	Ghir_D11	69693790
SPAD10d	Ghir_A02_106204996	Ghir_A02	106204996
	Ghir_A03_38819681	Ghir_A03	38819681
	Ghir_A08_8815321	Ghir_A08	8815321
	Ghir_A09_10201274	Ghir_A09	10201274
	Ghir_A11_106685862	Ghir_A11	106685862
	Ghir_D01_45419659	Ghir_D01	45419659
	Ghir_D02_10845792	Ghir_D02	10845792
	Ghir_D10_67634500	Ghir_D10	67634500
	Ghir_D11_56578201	Ghir_D11	56578201
	Ghir_D12_47559814	Ghir_D12	47559814
SPAD20d	Ghir_A02_76068276	Ghir_A02	76068276
	Ghir_A03_97729049	Ghir_A03	97729049
	Ghir_A05_102954044	Ghir_A05	102954044
	Ghir_A05_31725658	Ghir_A05	31725658
	Ghir_A07_55400435	Ghir_A07	55400435
	Ghir_A08_754201	Ghir_A08	754201
	Ghir_D01_45419668	Ghir_D01	45419668
	Ghir_D02_10946792	Ghir_D02	10946792
	Ghir_D04_4054376	Ghir_D04	4054376
	Ghir_D07_58566386	Ghir_D07	58566386
	Ghir_D08_47855544	Ghir_D08	47855544
	Ghir_D10_23320703	Ghir_D10	23320703
	Ghir_D10_67478024	Ghir_D10	67478024
	Ghir_D11_72207131	Ghir_D11	72207131
	Ghir_D12_10013024	Ghir_D12	10013024
NAWF0d	Ghir_A03_646535	Ghir_A03	646535
	Ghir_A04_75415595	Ghir_A04	75415595
	Ghir_A10_69117130	Ghir_A10	69117130
	Ghir_D02_63459257	Ghir_D02	63459257
	Ghir_D03_37952328	Ghir_D03	37952328
	Ghir_D04_30743366	Ghir_D04	30743366
	Ghir_D10_63067182	Ghir_D10	63067182
	Ghir_D13_60292895	Ghir_D13	60292895
NAWF7d	Ghir_A01_99116992	Ghir_A01	99116992
	Ghir_A03_646535	Ghir_A03	646535
	Ghir_A09_3532427	Ghir_A09	3532427
	Ghir_A10_68958398	Ghir_A10	68958398
	Ghir_D01_45878613	Ghir_D01	45878613
	Ghir_D02_63372137	Ghir_D02	63372137
	Ghir_D03_14657397	Ghir_D03	14657397
	Ghir_D03_37952328	Ghir_D03	37952328
	Ghir_D05_4933229	Ghir_D05	4933229
	Ghir_D08_50476783	Ghir_D08	50476783
	Ghir_D08_56382900	Ghir_D08	56382900
	Ghir_D08_8529441	Ghir_D08	8529441
	Ghir_D10_63067182	Ghir_D10	63067182
	Ghir_D11_5411462	Ghir_D11	5411462
	Ghir_D11_54200015	Ghir_D11	54200015
	Ghir_D13_59845157	Ghir_D13	59845157
	Ghir_D13_60292895	Ghir_D13	60292895
RSPAD	Ghir_A02_76068276	Ghir_A02	76068276
	Ghir_A03_97729049	Ghir_A03	97729049
	Ghir_A05_31725658	Ghir_A05	31725658
	Ghir_A08_3592145	Ghir_A08	3592145
	Ghir_A08_50699224	Ghir_A08	50699224
	Ghir_D03_38361459	Ghir_D03	38361459
	Ghir_D10_23320703	Ghir_D10	23320703
	Ghir_D10_67478024	Ghir_D10	67478024
	Ghir_D12_10013024	Ghir_D12	10013024
RDBW	Ghir_D04_55741127	Ghir_D04	55741127
NB	Ghir_A10_34961391	Ghir_A10	34961391
	Ghir_A10_41327378	Ghir_A10	41327378
	Ghir_D03_37952328	Ghir_D03	37952328
	Ghir_D04_55741127	Ghir_D04	55741127
	Ghir_D06_63510645	Ghir_D06	63510645

## Sheet: Table S5
Table S5 The summary of genomic regions associated with cotton senescence
Genomic loci	Chr	Start (bp)	End (bp)	Traits	Top SNP	QTN effect	LOD score	r2 (%)
Ghir_A01_98567059_100094397	Ghir_A01	98567059	100094397	NAWF7d_blup	Ghir_A01_99116992	0.1484	5.0253	2.8951
Ghir_A02_76068276_76270596	Ghir_A02	76068276	76270596	X2013RSPAD	Ghir_A02_76068276	-0.9903	19.5063	50.9998
				X2013SPAD20d	Ghir_A02_76068276	-42.4498	16.5092	43.5392
Ghir_A02_105891088_107196428	Ghir_A02	105891088	107196428	C2014SPAD20d	Ghir_A02_106821869	2.5716	4.3552	9.3967
				X2014RSPAD	Ghir_A02_107020042	0.0379	5.2796	7.5026
				SPAD10d_blup	Ghir_A02_106204996	0.4628	5.734	6.7826
				C2013SPAD10d	Ghir_A02_106204996	1.2278	4.9241	4.814
				C2013NAWF0d	Ghir_A02_106301754	0.1738	3.1663	2.6888
Ghir_A03_433214_663224	Ghir_A03	433214	663224	X2014RSPAD	Ghir_A03_583459	0.049	3.4213	8.205
				C2014UBW	Ghir_A03_610684	-0.2433	3.6129	5.5338
				X2014NAWF7d	Ghir_A03_646535	-0.1849	5.1342	3.6249
				NAWF0d_blup	Ghir_A03_646535	-0.1522	4.206	3.0034
Ghir_A03_38819681_38829832	Ghir_A03	38819681	38829832	SPAD10d_blup	Ghir_A03_38819681	0.515	5.337	9.2957
Ghir_A03_96920415_98588823	Ghir_A03	96920415	98588823	X2014RSPAD	Ghir_A03_97729049	-0.0432	7.2541	7.9068
				X2014SPAD20d	Ghir_A03_97729049	-1.9837	5.0705	7.0348
Ghir_A04_74702460_76049831	Ghir_A04	74702460	76049831	NAWF0d_blup	Ghir_A04_75415595	0.101	3.231	2.2464
Ghir_A04_82198944_82788606	Ghir_A04	82198944	82788606	SPAD0d_blup	Ghir_A04_82711366	0.2733	3.0258	3.8202
Ghir_A05_31518326_31768904	Ghir_A05	31518326	31768904	X2013SPAD20d	Ghir_A05_31725658	3.1835	5.626	5.8504
				C2013SPAD10d	Ghir_A05_31543877	1.112	3.3827	4.3379
				X2013RSPAD	Ghir_A05_31725658	0.0562	4.0665	3.9234
Ghir_A05_98131332_99400308	Ghir_A05	98131332	99400308	SPAD0d_blup	Ghir_A05_98616653	0.3889	7.8818	7.0614
				C2014SPAD0d	Ghir_A05_98352876	0.8038	4.1925	6.9391
				X2013SPAD10d	Ghir_A05_98629562	0.9336	7.6267	6.8281
Ghir_A05_102491604_103710478	Ghir_A05	102491604	103710478	SPAD20d_blup	Ghir_A05_102954044	0.5675	4.1773	3.9736
Ghir_A06_16443062_17735405	Ghir_A06	16443062	17735405	X2014NB	Ghir_A06_17006548	0.2993	5.4106	7.2477
				SPAD0d_blup	Ghir_A06_16888073	0.3635	5.072	6.841
Ghir_A07_55400435_55400791	Ghir_A07	55400435	55400791	SPAD20d_blup	Ghir_A07_55400435	0.7309	4.0232	6.1396
Ghir_A07_94707064_95015870	Ghir_A07	94707064	95015870	SPAD0d_blup	Ghir_A07_95015589	-0.3657	3.1667	6.1424
Ghir_A08_734113_1438240	Ghir_A08	734113	1438240	SPAD20d_blup	Ghir_A08_754201	-0.5266	4.39	3.5481
Ghir_A08_3347874_3963435	Ghir_A08	3347874	3963435	RSPAD_blup	Ghir_A08_3592145	-0.0103	3.4422	5.2764
Ghir_A08_8179833_9807715	Ghir_A08	8179833	9807715	C2014SPAD20d	Ghir_A08_8309665	3.5862	6.1337	11.6545
				SPAD10d_blup	Ghir_A08_8815321	0.7836	5.2087	7.0856
Ghir_A08_50699203_50699459	Ghir_A08	50699203	50699459	RSPAD_blup	Ghir_A08_50699224	0.0139	3.2792	8.7601
Ghir_A09_3145752_4508936	Ghir_A09	3145752	4508936	NAWF7d_blup	Ghir_A09_3532427	0.1229	5.5909	1.9877
Ghir_A09_9221373_10709520	Ghir_A09	9221373	10709520	SPAD10d_blup	Ghir_A09_10201274	0.4055	3.6026	5.6292
Ghir_A09_15503149_16440218	Ghir_A09	15503149	16440218	SPAD0d_blup	Ghir_A09_15552984	-0.3604	4.9479	6.0627
				X2013SPAD0d	Ghir_A09_15562085	-0.6579	3.4029	6.0245
Ghir_A10_34083373_35209164	Ghir_A10	34083373	35209164	NB_blup	Ghir_A10_34961391	0.2322	3.9162	6.0874
				C2013SPAD10d	Ghir_A10_34958459	1.7497	4.0045	2.9012
Ghir_A10_41327352_41327378	Ghir_A10	41327352	41327378	NB_blup	Ghir_A10_41327378	-0.4945	3.3651	0.0001
Ghir_A10_68643973_70113556	Ghir_A10	68643973	70113556	C2014NAWF7d	Ghir_A10_69721399	-0.4488	4.5039	8.5416
				NAWF0d_blup	Ghir_A10_69117130	-0.1726	3.7247	3.045
				NAWF7d_blup	Ghir_A10_68958398	-0.1868	4.7449	2.2963
Ghir_A11_105946902_107679604	Ghir_A11	105946902	107679604	X2013SPAD10d	Ghir_A11_106685862	1.1457	4.4021	5.5139
				C2014SPAD10d	Ghir_A11_106685862	1.2277	3.8086	5.4869
Ghir_D01_44425874_46626899	Ghir_D01	44425874	46626899	SPAD20d_blup	Ghir_D01_45419668	-1.0084	7.9599	12.6899
				X2013SPAD0d	Ghir_D01_46206777	1.0437	3.9557	9.1358
				SPAD10d_blup	Ghir_D01_45419659	-0.5311	4.6942	8.7244
				NAWF7d_blup	Ghir_D01_45878613	-0.1223	4.0764	1.7765
Ghir_D01_56361393_58327836	Ghir_D01	56361393	58327836	C2014MBW	Ghir_D01_57339746	-0.1954	7.29	9.8782
				X2014MBW	Ghir_D01_57342862	-0.1625	5.5018	9.6278
Ghir_D02_9881417_11323864	Ghir_D02	9881417	11323864	SPAD10d_blup	Ghir_D02_10845792	0.4477	4.6734	5.2623
				SPAD20d_blup	Ghir_D02_10946792	-0.5973	5.4235	4.561
				X2013RSPAD	Ghir_D02_10574454	-0.0563	6.9097	2.9604
Ghir_D02_62387129_64293571	Ghir_D02	62387129	64293571	NAWF0d_blup	Ghir_D02_63459257	-0.1273	5.5524	3.0361
				NAWF7d_blup	Ghir_D02_63372137	-0.1043	3.4582	1.6067
Ghir_D03_14263312_15495431	Ghir_D03	14263312	15495431	NAWF7d_blup	Ghir_D03_14657397	0.1539	3.5998	4.1103
Ghir_D03_37952328_38393621	Ghir_D03	37952328	38393621	C2013NAWF0d	Ghir_D03_37952328	0.5249	14.4844	26.307
				C2013NAWF7d	Ghir_D03_37952328	0.4686	9.819	17.3701
				NB_blup	Ghir_D03_37952328	0.2931	5.7298	17.2348
				NAWF7d_blup	Ghir_D03_37952328	0.3031	13.5595	16.269
				NAWF0d_blup	Ghir_D03_37952328	0.2499	10.5088	14.0275
				RSPAD_blup	Ghir_D03_38361459	0.017	3.5372	13.4247
Ghir_D04_3868460_4981624	Ghir_D04	3868460	4981624	SPAD20d_blup	Ghir_D04_4054376	1.043	3.823	7.7655
				C2014NB	Ghir_D04_4146406	0.3609	3.779	6.1007
Ghir_D04_30743366_30743366	Ghir_D04	30743366	30743366	C2014NAWF0d	Ghir_D04_30743366	-0.2478	4.2739	6.9383
				NAWF0d_blup	Ghir_D04_30743366	-0.1305	3.2018	3.3499
Ghir_D04_54806239_55960383	Ghir_D04	54806239	55960383	X2014UBW	Ghir_D04_55960383	-0.636	9.5437	16.0025
				X2014RDBW	Ghir_D04_55741127	0.0971	3.7008	11.5358
				X2014MBW	Ghir_D04_55960383	-0.2449	3.8254	7.7116
				C2014NB	Ghir_D04_55741127	-0.439	3.5471	4.8826
Ghir_D05_4010257_5790110	Ghir_D05	4010257	5790110	NAWF7d_blup	Ghir_D05_4933229	0.1042	4.9999	1.7413
Ghir_D06_26574988_28313394	Ghir_D06	26574988	28313394	SPAD0d_blup	Ghir_D06_27428670	-0.5372	10.0858	13.8549
				C2014MBW	Ghir_D06_27090468	-0.1998	6.832	9.5869
Ghir_D06_53954805_55852621	Ghir_D06	53954805	55852621	SPAD0d_blup	Ghir_D06_54933781	0.6226	5.4047	6.7238
Ghir_D06_63495532_64087126	Ghir_D06	63495532	64087126	NB_blup	Ghir_D06_63510645	-0.1941	3.6127	6.2344
				X2014SPAD10d	Ghir_D06_65670995	-0.6825	4.7205	4.8986
Ghir_D07_56255112_57298483	Ghir_D07	56255112	57298483	C2013SPAD0d	Ghir_D07_56337769	1.319	3.7046	7.306
				SPAD0d_blup	Ghir_D07_56337769	0.3905	3.5755	3.4505
Ghir_D07_58088158_58748518	Ghir_D07	58088158	58748518	SPAD20d_blup	Ghir_D07_58566386	1.1513	5.3041	5.6601
Ghir_D08_7607250_9320609	Ghir_D08	7607250	9320609	NAWF7d_blup	Ghir_D08_8529441	0.0813	3.1694	1.1739
Ghir_D08_46869418_48250042	Ghir_D08	46869418	48250042	SPAD20d_blup	Ghir_D08_47855544	0.9669	5.4729	9.6679
				X2014NB	Ghir_D08_46379479	-0.2906	5.2283	6.1408
				X2013SPAD20d	Ghir_D08_48114050	2.3663	4.5652	4.3412
Ghir_D08_50228903_50512237	Ghir_D08	50228903	50512237	C2014NAWF7d	Ghir_D08_50512237	0.2934	4.0518	6.0331
				NAWF7d_blup	Ghir_D08_50476783	0.1047	3.8558	1.732
Ghir_D08_55642702_57366737	Ghir_D08	55642702	57366737	X2014NAWF0d	Ghir_D08_55737967	0.1953	4.1704	5.7807
				NAWF7d_blup	Ghir_D08_56382900	0.1152	3.2145	1.8473
Ghir_D10_22893428_24279806	Ghir_D10	22893428	24279806	X2013SPAD20d	Ghir_D10_23320703	3.7637	5.8857	6.4064
				C2013SPAD10d	Ghir_D10_23867623	1.0931	4.9144	4.5674
				X2013RSPAD	Ghir_D10_23320703	0.0526	3.0353	2.688
Ghir_D10_63066992_63067182	Ghir_D10	63066992	63067182	X2014NAWF0d	Ghir_D10_63067182	0.3275	3.5123	12.0635
				X2014NAWF7d	Ghir_D10_63067182	0.2096	3.1658	5.1213
Ghir_D10_67478024_67634775	Ghir_D10	67478024	67634775	SPAD10d_blup	Ghir_D10_67634500	0.496	4.6757	5.9719
				C2013SPAD20d	Ghir_D10_67478024	1.8166	3.5172	5.9487
				C2013RSPAD	Ghir_D10_67478024	0.0345	3.3232	5.8005
Ghir_D12_9391570_10013024	Ghir_D12	9391570	10013024	RSPAD_blup	Ghir_D12_10013024	0.0248	5.1271	9.6669
				X2013SPAD20d	Ghir_D12_10013024	3.7833	6.4104	5.0823
Ghir_D12_46136970_47596586	Ghir_D12	46136970	47596586	SPAD10d_blup	Ghir_D12_47559814	-0.812	5.5411	14.9691
Ghir_D13_59408561_60730103	Ghir_D13	59408561	60730103	X2014MBW	Ghir_D13_60309190	-0.1622	5.4904	8.4366
				C2014MBW	Ghir_D13_60292895	0.1475	4.0813	5.6924
				C2013NAWF7d	Ghir_D13_60292895	0.2173	5.8756	3.6856
				NAWF0d_blup	Ghir_D13_60292895	0.126	5.002	3.5166
				NAWF7d_blup	Ghir_D13_59845157	-0.1034	3.9951	1.9071

## Sheet: Table S6
Table S6 Candidate genes recoded in Leaf Senescence Database LSD 3.0
Candidate genes	Homologs genes	E value	Gene Symbols
Ghir_A01G015240	AT2G42490	0	Symbols: | Copper amine oxidase family
Ghir_A01G015260	AT3G26580	e-116	Symbols: | Tetratricopeptide repeat (TPR)-like superfamily
Ghir_A02G012520	AT1G30500	3e-34	Symbols: NF-YA7 | nuclear factor Y
Ghir_A02G017380	AT1G14870	8e-47	Symbols: PCR2 | PLANT CADMIUM RESISTANCE
Ghir_A02G017480	AT2G26560	e-103	Symbols: PLP2
Ghir_A02G017500	AT4G37180	7e-51	Symbols: | Homeodomain-like superfamily protein |
Ghir_A02G017520	AT2G47460	8e-60	Symbols: MYB12
Ghir_A02G017660	AT2G23450	0	Symbols: | Protein kinase superfamily protein
Ghir_A02G017690	AT5G66560	0	Symbols: | Phototropic-responsive NPH3 family protein
Ghir_A02G017850	AT2G23790	e-129	Symbols: | Protein of unknown function
Ghir_A02G017950	AT3G50740	e-162	Symbols: UGT72E1 | UDP-glucosyl transferase 72E1
Ghir_A02G017980	AT4G36710	e-156	Symbols: | GRAS family transcription factor
Ghir_A02G018010	AT5G66730	e-108	Symbols: | C2H2-like zinc finger protein
Ghir_A02G018070	AT5G66760	8e-27	Symbols: SDH1-1 | succinate dehydrogenase 1-1
Ghir_A02G018090	AT4G36640	e-136	Symbols: | Sec14p-like phosphatidylinositol transfer family
Ghir_A02G018230	AT2G02540	6e-31	Symbols: ATHB21
Ghir_A02G018250	AT2G18290	e-113	Symbols: APC10 | anaphase promoting complex
Ghir_A03G000100	AT5G45290	4e-91	Symbols: | RING/U-box superfamily protein |
Ghir_A03G000120	AT4G19140	2e-96	Symbols: | unknown protein; Has 30201 -
Ghir_A03G000140	AT4G19040	0	Symbols: EDR2 | ENHANCED DISEASE RESISTANCE
Ghir_A03G000150	AT4G19010	0	Symbols: | AMP-dependent synthetase and ligase
Ghir_A03G000160	AT1G32080	0	Symbols: | membrane protein
Ghir_A03G000210	AT1G31940	4e-59	Symbols: | unknown protein; LOCATED IN: 13
Ghir_A03G000260	AT1G32130	0	Symbols: IWS1
Ghir_A03G000330	AT5G46910	0	Symbols: | Transcription factor jumonji (jmj) |
Ghir_A03G015180	AT1G70580	0	Symbols: AOAT2
Ghir_A03G015380	AT1G23440	e-107	Symbols: | Peptidase C15
Ghir_A03G015430	AT5G57040	2e-55	Symbols: | Lactoylglutathione lyase / glyoxalase
Ghir_A03G015480	AT1G23710	7e-69	Symbols: | Protein of unknown function
Ghir_A03G015490	AT1G10600	1e-77	Symbols: AMSH2 | associated molecule with LENGTH=223
Ghir_A04G010310	AT5G01600	e-104	Symbols: ATFER1
Ghir_A04G010400	AT2G38470	e-136	Symbols: WRKY33
Ghir_A04G010450	AT1G05620	0	Symbols: URH2 | uridine-ribohydrolase 2 |
Ghir_A04G010510	AT5G62620	0	Symbols: | Galactosyltransferase family protein |
Ghir_A04G013430	AT2G21210	1e-24	Symbols: | SAUR-like auxin-responsive protein family
Ghir_A04G013460	AT4G34710	0	Symbols: ADC2
Ghir_A04G013490	AT1G75540	2e-54	Symbols: STH2 | salt tolerance homolog2
Ghir_A04G013640	AT4G38630	e-153	Symbols: RPN10
Ghir_A04G013670	AT5G05320	e-143	Symbols: | FAD/NAD(P)-binding oxidoreductase family protein
Ghir_A04G013680	AT5G05320	e-150	Symbols: | FAD/NAD(P)-binding oxidoreductase family protein
Ghir_A04G013700	AT1G31830	0	Symbols: | Amino acid permease family
Ghir_A04G013770	AT2G17030	e-114	Symbols: | F-box family protein with LENGTH=407
Ghir_A04G013850	AT2G17650	e-110	Symbols: | AMP-dependent synthetase and ligase
Ghir_A04G013880	AT2G02040	0	Symbols: ATPTR2-B
Ghir_A05G028460	AT5G24080	1e-81	Symbols: | Protein kinase superfamily protein
Ghir_A05G028470	AT5G24080	6e-86	Symbols: | Protein kinase superfamily protein
Ghir_A05G028490	AT3G10940	e-127	Symbols: | dual specificity protein phosphatase
Ghir_A05G037340	AT5G40240	e-100	Symbols: | nodulin MtN21 /EamA-like transporter
Ghir_A05G037350	AT3G28050	e-152	Symbols: | nodulin MtN21 /EamA-like transporter
Ghir_A05G037360	AT3G01420	0	Symbols: ALPHA-DOX1
Ghir_A05G037370	AT3G01420	0	Symbols: ALPHA-DOX1
Ghir_A05G037450	AT5G14940	0	Symbols: | Major facilitator superfamily protein
Ghir_A05G037470	AT5G14970	e-118	Symbols: | unknown protein; BEST Arabidopsis Blast
Ghir_A05G037630	AT5G15130	1e-73	Symbols: WRKY72
Ghir_A05G038960	AT5G45890	e-135	Symbols: SAG12 | senescence-associated gene 12
Ghir_A05G038970	AT5G45890	e-136	Symbols: SAG12 | senescence-associated gene 12
Ghir_A05G038980	AT5G50260	1e-91	Symbols: | Cysteine proteinases superfamily protein
Ghir_A05G039120	AT1G29400	0	Symbols: AML5
Ghir_A05G039180	AT4G18170	9e-55	Symbols: WRKY28
Ghir_A05G039310	AT2G30800	0	Symbols: HVT1
Ghir_A05G039320	AT4G19645	e-128	Symbols: | TRAM
Ghir_A05G039330	AT5G17230	e-152	Symbols: PSY | PHYTOENE SYNTHASE |
Ghir_A05G039410	AT3G52430	e-100	Symbols: PAD4
Ghir_A05G039420	AT5G09220	0	Symbols: AAP2 | amino acid permease
Ghir_A06G007030	AT4G26080	8e-98	Symbols: ABI1
Ghir_A06G007070	AT4G29130	0	Symbols: ATHXK1
Ghir_A06G007080	AT4G29120	e-169	Symbols: | 6-phosphogluconate dehydrogenase family protein
Ghir_A06G007270	AT2G19800	e-180	Symbols: MIOX2 | myo-inositol oxygenase 2
Ghir_A06G007300	AT4G29160	7e-68	Symbols: SNF7.1 | SNF7 family protein
Ghir_A06G007370	AT4G29420	e-135	Symbols: | F-box/RNI-like superfamily protein |
Ghir_A06G007410	AT4G29490	0	Symbols: | Metallopeptidase M24 family protein
Ghir_A07G023040	AT5G44090	0	Symbols: | Calcium-binding EF-hand family protein
Ghir_A07G023050	AT4G28550	0	Symbols: | Ypt/Rab-GAP domain of gyp1p
Ghir_A07G023080	AT5G44060	6e-31	Symbols: | unknown protein; BEST Arabidopsis Blast
Ghir_A07G023090	AT4G28600	e-100	Symbols: NPGR2 | no pollen germination
Ghir_A08G000990	AT2G27510	3e-66	Symbols: ATFD3
Ghir_A08G001130	AT1G08370	e-121	Symbols: DCP1
Ghir_A08G001170	AT5G21990	0	Symbols: TPR7 | Tetratricopeptide repeat (TPR)-like
Ghir_A08G001280	AT2G28500	3e-63	Symbols: LBD11 | LOB domain-containing protein
Ghir_A08G001300	AT5G60460	3e-21	Symbols: | Preprotein translocase Sec
Ghir_A08G001330	AT2G31955	0	Symbols: CNX2 | cofactor of nitrate
Ghir_A08G001450	AT5G12200	0	Symbols: PYD2 | pyrimidine 2 |
Ghir_A08G001630	AT2G42500	0	Symbols: PP2A-3 | protein phosphatase 2A-3
Ghir_A08G001660	AT5G19875	1e-27	Symbols: | unknown protein; FUNCTIONS IN: IN:
Ghir_A08G003420	AT3G52080	0	Symbols: chx28 | cation/hydrogen exchanger 28
Ghir_A08G003490	AT5G47080	e-145	Symbols: CKB1 | casein kinase II
Ghir_A08G003670	AT3G61530	e-118	Symbols: PANB2 | Phosphoenolpyruvate carboxylase family
Ghir_A08G003710	AT4G00660	0	Symbols: RH8
Ghir_A08G003750	AT4G33565	1e-21	Symbols: | RING/U-box superfamily protein |
Ghir_A08G003760	AT3G61050	0	Symbols: NTMC2TYPE4
Ghir_A08G003780	AT3G61600	0	Symbols: ATPOB1
Ghir_A08G003790	AT3G61600	e-160	Symbols: ATPOB1
Ghir_A08G003850	AT3G08770	2e-09	Symbols: LTP6 | lipid transfer protein
Ghir_A08G003880	AT1G22640	2e-68	Symbols: ATMYB3
Ghir_A08G006200	AT4G23010	2e-86	Symbols: UTR2 | UDP-galactose transporter 2
Ghir_A08G006260	AT4G26160	2e-81	Symbols: ACHT1 | atypical CYS HIS
Ghir_A08G006290	AT1G02140	e-100	Symbols: MEE63
Ghir_A08G006300	AT1G02130	e-141	Symbols: ATRAB1B
Ghir_A08G006400	AT2G44850	e-112	Symbols: | unknown protein; CONTAINS InterPro protein
Ghir_A08G006510	AT2G31260	0	Symbols: APG9
Ghir_A08G006590	AT4G03030	e-173	Symbols: | Galactose oxidase/kelch repeat superfamily
Ghir_A08G006660	AT2G30580	e-157	Symbols: DRIP2 | DREB2A-interacting protein 2
Ghir_A09G001460	AT5G39670	2e-41	Symbols: | Calcium-binding EF-hand family protein
Ghir_A09G001470	AT1G19250	e-100	Symbols: FMO1 | flavin-dependent monooxygenase 1
Ghir_A09G001480	AT5G39660	7e-78	Symbols: CDF2 | cycling DOF factor
Ghir_A09G001490	AT3G01170	1e-54	Symbols: | Ribosomal protein L34e superfamily
Ghir_A09G001500	AT1G26800	2e-20	Symbols: | RING/U-box superfamily protein |
Ghir_A09G001510	AT3G13430	1e-06	Symbols: | RING/U-box superfamily protein |
Ghir_A09G001520	AT1G26800	3e-25	Symbols: | RING/U-box superfamily protein |
Ghir_A09G001530	AT1G26800	4e-16	Symbols: | RING/U-box superfamily protein |
Ghir_A09G001540	AT1G26800	1e-16	Symbols: | RING/U-box superfamily protein |
Ghir_A09G001570	AT1G26800	1e-23	Symbols: | RING/U-box superfamily protein |
Ghir_A09G001670	AT3G28920	1e-33	Symbols: AtHB34
Ghir_A09G003090	AT3G27670	0	Symbols: RST1 | ARM repeat superfamily
Ghir_A09G003300	AT4G35860	e-149	Symbols: ATRABB1B
Ghir_A09G003980	AT3G01900	0	Symbols: CYP94B2 | cytochrome P450
Ghir_A10G012940	AT1G47890	e-104	Symbols: AtRLP7
Ghir_A10G013080	AT3G23790	0	Symbols: AAE16 | AMP-dependent synthetase and
Ghir_A11G026760	AT5G09225	8e-19	Symbols: | unknown protein; FUNCTIONS IN: system;
Ghir_A11G026820	AT1G08620	0	Symbols: PKDM7D | Transcription factor jumonji protein
Ghir_A11G026850	AT1G08630	0	Symbols: THA1 | threonine aldolase 1
Ghir_A11G026910	AT5G43700	8e-86	Symbols: ATAUX2-11
Ghir_A11G026960	AT3G63380	0	Symbols: | ATPase E1-E2 type family REVERSE
Ghir_A11G026970	AT3G63380	0	Symbols: | ATPase E1-E2 type family REVERSE
Ghir_A11G026990	AT2G30580	e-118	Symbols: DRIP2 | DREB2A-interacting protein 2
Ghir_A11G027120	AT1G08800	7e-69	Symbols: | Protein of unknown function
Ghir_A11G027260	AT2G34930	9e-62	Symbols: | disease resistance family protein
Ghir_A11G027270	AT3G23240	2e-49	Symbols: ERF1
Ghir_A11G027280	AT3G23240	1e-45	Symbols: ERF1
Ghir_A11G027290	AT3G23240	1e-55	Symbols: ERF1
Ghir_A11G027340	AT3G04720	3e-88	Symbols: PR4
Ghir_D01G015660	AT2G01570	0	Symbols: RGA1
Ghir_D01G015790	AT2G01430	5e-68	Symbols: ATHB17
Ghir_D02G007120	AT1G21200	e-170	Symbols: | sequence-specific DNA binding transcription
Ghir_D02G007150	AT1G43700	7e-13	Symbols: VIP1
Ghir_D02G007160	AT1G43700	8e-50	Symbols: VIP1
Ghir_D02G007300	AT1G78780	8e-69	Symbols: | pathogenesis-related family protein |
Ghir_D02G007330	AT1G77120	0	Symbols: ADH1
Ghir_D02G007350	AT1G77120	0	Symbols: ADH1
Ghir_D02G007370	AT1G77120	0	Symbols: ADH1
Ghir_D02G007380	AT1G77120	0	Symbols: ADH1
Ghir_D02G007550	AT2G34930	6e-40	Symbols: | disease resistance family protein
Ghir_D02G007570	AT4G19950	6e-52	Symbols: | unknown protein; BEST Arabidopsis Blast
Ghir_D02G007610	AT1G21410	0	Symbols: SKP2A | F-box/RNI-like superfamily protein
Ghir_D02G007620	AT1G76990	0	Symbols: ACR3 | ACT domain repeat
Ghir_D02G007660	AT1G21400	0	Symbols: | Thiamin diphosphate-binding fold (THDP-binding)
Ghir_D02G018290	AT1G11680	0	Symbols: CYP51G1
Ghir_D02G018310	AT1G28130	0	Symbols: GH3.17 | Auxin-responsive GH3 family
Ghir_D02G018330	AT1G20780	8e-30	Symbols: PUB44
Ghir_D02G018410	AT3G54680	6e-19	Symbols: | proteophosphoglycan-related | chr3:20244568-20245689 FORWARD
Ghir_D02G018430	AT1G28480	3e-44	Symbols: GRX480
Ghir_D02G018550	AT4G28370	0	Symbols: | RING/U-box superfamily protein |
Ghir_D02G018620	AT4G03600	3e-51	Symbols: | unknown protein; BEST Arabidopsis Blast
Ghir_D02G018680	AT4G28300	7e-85	Symbols: | Protein of unknown function
Ghir_D02G018720	AT5G08590	4e-55	Symbols: ASK2
Ghir_D02G018810	AT4G28140	5e-45	Symbols: | Integrase-type DNA-binding superfamily protein
Ghir_D02G018870	AT4G03420	e-154	Symbols: | Protein of unknown function
Ghir_D02G018940	AT4G03390	0	Symbols: SRF3 | STRUBBELIG-receptor family 3
Ghir_D02G018980	AT2G20830	e-132	Symbols: | transferases;folic acid binding |
Ghir_D02G019100	AT4G03280	e-113	Symbols: PETC
Ghir_D02G019110	AT4G03280	e-114	Symbols: PETC
Ghir_D02G019130	AT3G23250	2e-58	Symbols: MYB15
Ghir_D02G019140	AT5G08240	2e-11	Symbols: | unknown protein; BEST Arabidopsis Blast
Ghir_D02G019170	AT2G19130	6e-34	Symbols: | S-locus lectin protein kinase
Ghir_D02G019180	AT2G19130	0	Symbols: | S-locus lectin protein kinase
Ghir_D02G019190	AT2G19130	2e-99	Symbols: | S-locus lectin protein kinase
Ghir_D02G019230	AT4G27310	2e-32	Symbols: | B-box type zinc finger
Ghir_D04G002880	AT1G49230	2e-59	Symbols: | RING/U-box superfamily protein |
Ghir_D04G002890	AT1G49230	6e-51	Symbols: | RING/U-box superfamily protein |
Ghir_D04G002910	AT1G49230	2e-53	Symbols: | RING/U-box superfamily protein |
Ghir_D04G002920	AT1G49230	2e-71	Symbols: | RING/U-box superfamily protein |
Ghir_D04G002930	AT1G49230	9e-74	Symbols: | RING/U-box superfamily protein |
Ghir_D04G002940	AT1G49230	2e-60	Symbols: | RING/U-box superfamily protein |
Ghir_D04G002950	AT1G49230	2e-77	Symbols: | RING/U-box superfamily protein |
Ghir_D04G002970	AT3G18770	e-144	Symbols: | Autophagy-related protein 13 |
Ghir_D04G003040	AT3G18770	e-141	Symbols: | Autophagy-related protein 13 |
Ghir_D04G003080	AT3G18770	2e-31	Symbols: | Autophagy-related protein 13 |
Ghir_D04G003410	AT5G64040	3e-49	Symbols: PSAN | photosystem I reaction |
Ghir_D04G003430	AT1G31130	1e-49	Symbols: | unknown protein; FUNCTIONS IN: unknown;
Ghir_D04G003480	AT5G09300	0	Symbols: | Thiamin diphosphate-binding fold (THDP-binding)
Ghir_D04G003500	AT5G64530	2e-39	Symbols: ANAC104
Ghir_D04G003540	AT1G21390	6e-11	Symbols: emb2170 | embryo defective 2170
Ghir_D04G019330	AT4G21120	0	Symbols: AAT1
Ghir_D04G019420	AT1G70300	0	Symbols: KUP6 | K+ uptake permease
Ghir_D04G019490	AT2G44050	3e-98	Symbols: COS1 | 6
Ghir_D04G019510	AT3G55240	1e-24	Symbols: | Plant protein 1589 of
Ghir_D04G019670	AT1G13195	3e-78	Symbols: | RING/U-box superfamily protein |
Ghir_D04G019720	AT3G26000	e-126	Symbols: | Ribonuclease inhibitor | chr3:9507042-9508542
Ghir_D04G019740	AT1G76810	0	Symbols: | eukaryotic translation initiation factor
Ghir_D04G019750	AT5G14280	2e-75	Symbols: | DNA-binding storekeeper protein-related |
Ghir_D04G019820	AT1G67980	5e-82	Symbols: CCOAMT | caffeoyl-CoA 3-O-methyltransferase |
Ghir_D04G019850	AT1G67980	e-105	Symbols: CCOAMT | caffeoyl-CoA 3-O-methyltransferase |
Ghir_D04G019860	AT1G67980	2e-94	Symbols: CCOAMT | caffeoyl-CoA 3-O-methyltransferase |
Ghir_D04G019880	AT1G67360	1e-36	Symbols: | Rubber elongation factor protein
Ghir_D04G019890	AT5G43260	4e-50	Symbols: | chaperone protein dnaJ-related |
Ghir_D04G019970	AT1G27300	6e-24	Symbols: | unknown protein; Has 54 -
Ghir_D04G020200	AT1G27990	8e-75	Symbols: | unknown protein; BEST Arabidopsis Blast
Ghir_D05G005010	AT5G23340	3e-20	Symbols: | RNI-like superfamily protein |
Ghir_D05G005040	AT2G28830	1e-14	Symbols: PUB12
Ghir_D05G005050	AT5G11590	2e-67	Symbols: TINY2 | Integrase-type DNA-binding superfamily
Ghir_D05G005060	AT3G63520	8e-51	Symbols: CCD1
Ghir_D05G005070	AT3G63520	8e-46	Symbols: CCD1
Ghir_D05G005100	AT5G17050	e-126	Symbols: UGT78D2 | UDP-glucosyl transferase 78D2
Ghir_D05G005210	AT5G25620	0	Symbols: YUC6 | Flavin-binding monooxygenase family
Ghir_D05G005260	AT4G32690	1e-64	Symbols: GLB3
Ghir_D05G005330	AT3G42640	0	Symbols: AHA8
Ghir_D05G005340	AT1G15860	6e-87	Symbols: | Domain of unknown function
Ghir_D05G005350	AT4G19810	3e-85	Symbols: | Glycosyl hydrolase family protein
Ghir_D05G005370	AT5G58200	e-140	Symbols: | Calcineurin-like metallo-phosphoesterase superfamily protein
Ghir_D05G005420	AT5G58070	4e-81	Symbols: ATTIL
Ghir_D05G005440	AT5G58170	0	Symbols: SVL5 | SHV3-like 5 |
Ghir_D05G005500	AT5G58005	1e-49	Symbols: | Cytochrome c oxidase
Ghir_D05G005510	AT4G30960	0	Symbols: CIPK6
Ghir_D05G005530	AT2G24240	0	Symbols: | BTB/POZ domain with WD40/YVTN
Ghir_D05G005580	AT4G28088	2e-28	Symbols: | Low temperature and salt
Ghir_D05G005590	AT5G57910	2e-29	Symbols: | unknown protein; BEST Arabidopsis Blast
Ghir_D05G005670	AT5G57950	e-109	Symbols: | 26S proteasome regulatory subunit
Ghir_D05G005750	AT3G15730	0	Symbols: PLDALPHA1
Ghir_D05G005760	AT5G25360	4e-59	Symbols: | unknown protein; BEST Arabidopsis Blast
Ghir_D05G005830	AT4G32280	5e-41	Symbols: IAA29 | indole-3-acetic acid inducible
Ghir_D05G005840	AT4G32250	0	Symbols: | Protein kinase superfamily protein
Ghir_D05G005860	AT4G32150	e-127	Symbols: VAMP711
Ghir_D05G005960	AT2G25290	0	Symbols: Phox1 | Octicosapeptide/Phox/Bem1p (PB1) domain-containing LENGTH=745
Ghir_D05G005990	AT5G25220	0	Symbols: KNAT3 | KNOTTED1-like homeobox gene
Ghir_D05G006020	AT4G31990	0	Symbols: ASP5
Ghir_D05G006030	AT5G25190	1e-53	Symbols: | Integrase-type DNA-binding superfamily protein
Ghir_D05G006080	AT4G31910	e-159	Symbols: | HXXXD-type acyl-transferase family protein
Ghir_D05G006090	AT2G32070	e-158	Symbols: | Polynucleotidyl transferase
Ghir_D05G006170	AT5G25150	0	Symbols: TAF5 | TBP-associated factor 5
Ghir_D05G006180	AT5G25110	0	Symbols: CIPK25
Ghir_D05G006250	AT4G31820	0	Symbols: ENP
Ghir_D05G006320	AT4G31860	0	Symbols: | Protein phosphatase 2C family
Ghir_D05G006370	AT2G24820	0	Symbols: TIC55-II | translocon at the LENGTH=539
Ghir_D05G006410	AT1G80450	3e-15	Symbols: | VQ motif-containing protein |
Ghir_D05G006450	AT5G10770	e-176	Symbols: | Eukaryotic aspartyl protease family
Ghir_D05G006460	AT5G10770	e-178	Symbols: | Eukaryotic aspartyl protease family
Ghir_D05G006470	AT5G10770	e-145	Symbols: | Eukaryotic aspartyl protease family
Ghir_D05G006480	AT5G10770	1e-44	Symbols: | Eukaryotic aspartyl protease family
Ghir_D05G006630	AT4G31550	e-117	Symbols: WRKY11
Ghir_D05G006720	AT5G24870	1e-91	Symbols: | RING/U-box superfamily protein |
Ghir_D05G006780	AT4G31420	0	Symbols: | Zinc finger protein 622
Ghir_D05G006920	AT5G19900	5e-94	Symbols: | PRLI-interacting factor
Ghir_D05G006940	AT3G20750	7e-19	Symbols: GATA29 | GATA transcription factor
Ghir_D05G006950	AT5G06770	5e-45	Symbols: | KH domain-containing protein / LENGTH=240
Ghir_D05G007040	AT3G45140	0	Symbols: LOX2
Ghir_D05G007080	AT1G73730	e-173	Symbols: EIL3
Ghir_D06G011760	AT4G31410	e-103	Symbols: | Protein of unknown function
Ghir_D06G011810	AT1G16810	1e-22	Symbols: | unknown protein; CONTAINS InterPro 395
Ghir_D06G011900	AT5G44460	2e-17	Symbols: CML43 | calmodulin like 43
Ghir_D06G011950	AT4G31130	3e-94	Symbols: | Protein of unknown function
Ghir_D06G016060	AT4G19640	e-114	Symbols: ARA7
Ghir_D06G016160	AT1G17280	e-124	Symbols: UBC34 | ubiquitin-conjugating enzyme 34
Ghir_D06G016320	AT1G54100	0	Symbols: ALDH7B4 | aldehyde dehydrogenase 7B4
Ghir_D06G016330	AT1G54115	0	Symbols: ATCCX4
Ghir_D06G016350	AT5G49880	0	Symbols: | mitotic checkpoint family protein
Ghir_D06G020750	AT1G30700	0	Symbols: | FAD-binding Berberine family protein
Ghir_D06G020760	AT1G26420	0	Symbols: | FAD-binding Berberine family protein
Ghir_D06G020770	AT1G51660	e-121	Symbols: ATMKK4
Ghir_D06G020810	AT4G31860	0	Symbols: | Protein phosphatase 2C family
Ghir_D06G020830	AT3G12740	e-163	Symbols: ALIS1 | ALA-interacting subunit 1
Ghir_D06G020850	AT2G32070	e-171	Symbols: | Polynucleotidyl transferase
Ghir_D06G020860	AT1G15880	7e-98	Symbols: GOS11
Ghir_D06G020890	AT5G25190	3e-53	Symbols: | Integrase-type DNA-binding superfamily protein
Ghir_D07G023140	AT5G02100	1e-43	Symbols: UNE18
Ghir_D07G023150	AT1G50010	4e-32	Symbols: TUA2 | tubulin alpha-2 chain
Ghir_D07G023340	AT3G28580	0	Symbols: | P-loop containing nucleoside triphosphate
Ghir_D07G023510	AT3G28210	5e-57	Symbols: PMZ
Ghir_D07G023540	AT5G14930	e-108	Symbols: SAG101 | senescence-associated gene 101
Ghir_D07G023620	AT5G40240	1e-74	Symbols: | nodulin MtN21 /EamA-like transporter
Ghir_D07G024390	AT3G26000	2e-78	Symbols: | Ribonuclease inhibitor | chr3:9507042-9508542
Ghir_D07G024490	AT3G01830	2e-27	Symbols: | Calcium-binding EF-hand family protein
Ghir_D07G024500	AT3G01850	e-132	Symbols: | Aldolase-type TIM barrel family
Ghir_D07G024530	AT3G27200	2e-53	Symbols: | Cupredoxin superfamily protein |
Ghir_D07G024630	AT3G27110	e-122	Symbols: | Peptidase family M48 family
Ghir_D07G024740	AT1G28960	1e-59	Symbols: ATNUDT15
Ghir_D07G024830	AT5G13080	3e-57	Symbols: WRKY75
Ghir_D07G024840	AT3G01980	5e-64	Symbols: | NAD(P)-binding Rossmann-fold superfamily protein
Ghir_D08G006380	AT4G26160	1e-80	Symbols: ACHT1 | atypical CYS HIS
Ghir_D08G006410	AT1G02140	e-100	Symbols: MEE63
Ghir_D08G006430	AT1G02130	e-141	Symbols: ATRAB1B
Ghir_D08G006530	AT2G44850	e-111	Symbols: | unknown protein; CONTAINS InterPro protein
Ghir_D08G006660	AT2G31260	0	Symbols: APG9
Ghir_D08G006730	AT4G03030	e-125	Symbols: | Galactose oxidase/kelch repeat superfamily
Ghir_D08G006810	AT2G30580	6e-96	Symbols: DRIP2 | DREB2A-interacting protein 2
Ghir_D08G006850	AT5G43700	9e-77	Symbols: ATAUX2-11
Ghir_D08G006970	AT3G63380	0	Symbols: | ATPase E1-E2 type family REVERSE
Ghir_D08G013660	AT3G62240	e-151	Symbols: | RING/U-box superfamily protein |
Ghir_D08G013680	AT3G05610	e-152	Symbols: | Plant invertase/pectin methylesterase inhibitor
Ghir_D08G013690	AT1G54290	2e-56	Symbols: | Translation initiation factor SUI1
Ghir_D08G013700	AT4G01840	e-144	Symbols: KCO5
Ghir_D08G013710	AT3G62150	0	Symbols: PGP21 | P-glycoprotein 21 |
Ghir_D08G013920	AT4G17880	2e-86	Symbols: | Basic helix-loop-helix (bHLH) DNA-binding
Ghir_D08G013950	AT2G46690	1e-43	Symbols: | SAUR-like auxin-responsive protein family
Ghir_D08G014700	AT4G00660	0	Symbols: RH8
Ghir_D08G014790	AT1G01730	5e-31	Symbols: | unknown protein; FUNCTIONS IN: EXPRESSED
Ghir_D08G017310	AT4G17900	e-103	Symbols: | PLATZ transcription factor family
Ghir_D08G017330	AT1G32640	0	Symbols: ATMYC2
Ghir_D08G017440	AT1G32560	5e-07	Symbols: | Late embryogenesis abundant protein
Ghir_D08G017550	AT1G32450	0	Symbols: NRT1.5 | nitrate transporter 1.5
Ghir_D08G017580	AT1G17020	e-112	Symbols: SRG1
Ghir_D08G017590	AT4G18010	0	Symbols: IP5PII
Ghir_D08G017620	AT1G32410	2e-57	Symbols: | Vacuolar protein sorting 55
Ghir_D08G017660	AT2G38740	e-123	Symbols: | Haloacid dehalogenase-like hydrolase (HAD)
Ghir_D08G017810	AT1G32740	1e-74	Symbols: | SBP (S-ribonuclease binding protein)
Ghir_D08G017840	AT5G47060	7e-42	Symbols: | Protein of unknown function
Ghir_D08G017900	AT5G47080	e-151	Symbols: CKB1 | casein kinase II
Ghir_D08G017940	AT4G33950	0	Symbols: OST1
Ghir_D08G017990	AT2G44730	1e-19	Symbols: | Alcohol dehydrogenase transcription factor
Ghir_D08G018130	AT5G47120	e-109	Symbols: ATBI-1
Ghir_D08G018150	AT5G47180	7e-95	Symbols: | Plant VAMP (vesicle-associated membrane
Ghir_D08G018180	AT5G02890	6e-75	Symbols: | HXXXD-type acyl-transferase family protein
Ghir_D08G018200	AT1G02130	e-137	Symbols: ATRAB1B
Ghir_D08G018280	AT5G47220	9e-63	Symbols: ATERF2
Ghir_D08G018290	AT4G17500	5e-69	Symbols: ATERF-1
Ghir_D08G018300	AT4G17500	4e-62	Symbols: ATERF-1
Ghir_D10G013600	AT3G57880	0	Symbols: | Calcium-dependent lipid-binding (CaLB domain)
Ghir_D10G013700	AT2G25470	1e-27	Symbols: AtRLP21
Ghir_D10G013710	AT2G34930	e-112	Symbols: | disease resistance family protein
Ghir_D10G013720	AT2G34930	2e-41	Symbols: | disease resistance family protein
Ghir_D10G013730	AT2G34930	4e-32	Symbols: | disease resistance family protein
Ghir_D10G013770	AT4G12610	2e-18	Symbols: RAP74
Ghir_D10G013800	AT2G43080	e-153	Symbols: AT-P4H-1 | P4H isoform 1
Ghir_D10G013860	AT3G59280	3e-58	Symbols: TXR1 | Protein Transporter
Ghir_D10G013950	AT3G59350	0	Symbols: | Protein kinase superfamily protein
Ghir_D10G013990	AT2G31500	0	Symbols: CPK24 | calcium-dependent protein kinase
Ghir_D10G026930	AT3G56170	e-150	Symbols: CAN | Ca-2+ dependent nuclease
Ghir_D10G026970	AT3G10985	8e-40	Symbols: SAG20
Ghir_D10G027020	AT2G38800	3e-18	Symbols: | Plant calmodulin-binding protein-related |
Ghir_D10G027030	AT1G29050	e-139	Symbols: TBL38 | TRICHOME BIREFRINGENCE-LIKE 38
Ghir_D12G005650	AT1G56170	2e-38	Symbols: HAP5B
Ghir_D12G005700	AT2G04100	e-168	Symbols: | MATE efflux family protein
Ghir_D12G005720	AT1G30420	e-171	Symbols: ATMRP12
Ghir_D12G005790	AT4G37370	0	Symbols: CYP81D8 | cytochrome P450
Ghir_D12G015240	AT5G44240	0	Symbols: ALA2 | aminophospholipid ATPase 2
Ghir_D12G015260	AT2G20570	2e-75	Symbols: GPRI1 | GBF's pro-rich region-interacting
Ghir_D12G015350	AT3G26690	3e-74	Symbols: ATNUDT13
Ghir_D12G015360	AT1G11680	0	Symbols: CYP51G1
Ghir_D12G015460	AT2G34930	e-168	Symbols: | disease resistance family protein
Ghir_D12G015500	AT3G27010	6e-70	Symbols: AT-TCP20
Ghir_D12G015520	AT3G07565	6e-22	Symbols: | Protein of unknown function
Ghir_D12G015550	AT4G02510	8e-89	Symbols: TOC159
Ghir_D12G015570	AT1G15110	0	Symbols: | phosphatidyl serine synthase family
Ghir_D12G015660	AT2G01110	e-133	Symbols: APG2
Ghir_D12G015670	AT3G48000	0	Symbols: ALDH2B4
Ghir_D12G015710	AT1G23550	5e-52	Symbols: SRO2 | similar to RCD
Ghir_D12G015790	AT1G10650	e-140	Symbols: | SBP (S-ribonuclease binding protein)
Ghir_D12G015840	AT1G70530	0	Symbols: CRK3 | cysteine-rich RLK (RECEPTOR-like
Ghir_D12G015860	AT1G12940	0	Symbols: ATNRT2.5
Ghir_D12G015900	AT2G42490	0	Symbols: | Copper amine oxidase family
Ghir_D12G015910	AT3G26510	6e-19	Symbols: | Octicosapeptide/Phox/Bem1p family protein |
Ghir_D13G021690	AT1G35190	0	Symbols: | 2-oxoglutarate (2OG) and Fe(II)-dependent
Ghir_D13G021720	AT5G57050	5e-95	Symbols: ABI2
Ghir_D13G021730	AT4G29130	0	Symbols: ATHXK1
Ghir_D13G021960	AT1G11020	e-145	Symbols: | RING/FYVE/PHD zinc finger superfamily
Ghir_D13G022030	AT4G24220	0	Symbols: VEP1
Ghir_D13G022060	AT2G34160	5e-72	Symbols: | Alba DNA/RNA-binding protein |
Ghir_D13G022290	AT5G34850	0	Symbols: ATPAP26
Ghir_D13G022330	AT1G15690	0	Symbols: AVP1
Ghir_D13G022350	AT2G25290	0	Symbols: Phox1 | Octicosapeptide/Phox/Bem1p (PB1) domain-containing LENGTH=745
Ghir_D13G022430	AT2G15580	3e-50	Symbols: | RING/U-box superfamily protein |
Ghir_D13G022640	AT3G22760	9e-63	Symbols: SOL1 | Tesmin/TSO1-like CXC domain-containing
Ghir_D13G022650	AT5G25450	6e-58	Symbols: | Cytochrome bd ubiquinol oxidase

## Sheet: Table S7
Table S7 List of paired primers used in this study
Paired primers	Sequences (5 '-> 3')
vGhCDF1-F	agtggtctctgtccagtcctTGGGTCGGGCTTTCGTTATC
vGhCDF1-R	ggtctcagcagaccacaagtATTGGTCTTCCCATCCACGC
qGhCDF1-F	TATGCCGGACATGAGAGAAGCG
qGhCDF1-R	CAGCTACCTGAAAGGCAGGTCC
qGhWRKY27-F	CCTACGGAACAGCCACAACAA
qGhWRKY27-R	CTTCCAGCAGGTTTTCAGAGC
qGhWRKY42-F	TTTTATGACGGTGAAAACAGGGG
qGhWRKY42-R	ACGATGAACATGGCTGCTTACTATC
qGhWAKL14-F	GCTGTATCGAGGAAGGTGAACCG
qGhWAKL14-R	CGGCGATAGTGAGCCTTGTCAT
qGhABI2-F	CCGAGTTGACTCACACCACGAG
qGhABI2-R	ATCCGCCGTTAATATCTCGCCG
qGhHis3-F	ACACCAACCTTTGCGCGATCCA
qGhHis3-R	CTAAGCGACTGATCCACACTTCTGG
